# Supplementary material
Source: ML conference proceedings conference paper supplement (https://proceedings.mlr.press/v108/xu20a.html)
Supplement: Supplementary file [file xu20a-supp.pdf]

# Supplementary Material

## A Stein Goodness-of-fit Test for Directional Distributions

### A Uniformity test

We present Rayleigh test and Kuiper test for uniformity.

#### A.1 Rayleigh Test

The test statistic of Rayleigh test is

$$R_n := \frac{2}{n} \left[ \left( \sum_{i=1}^n \cos \theta_i \right)^2 + \left( \sum_{i=1}^n \sin \theta_i \right)^2 \right].$$

Under the null, we have  $R_n \sim \chi_2^2$ . Therefore, the critical value is given by the quantile of chi-square distribution. For example, if the significance level is set to  $\alpha = 0.01$ , then the critical value is 9.210.

#### A.2 Kuiper Test

Kuiper test for uniformity is based on the cumulative distribution function (cdf). The cdf of the uniform distribution is

$$F(\theta) = \frac{\theta}{2\pi}.$$

We sort the samples to  $0 \leq \theta_1 \leq \dots \leq \theta_n \leq 2\pi$  and compute

$$D_n^+ := \sqrt{n} \sup_{\theta \in [0, 2\pi)} \{F_n(\theta) - F(\theta)\} = \sqrt{n} \max_{1 \leq i \leq n} \left( \frac{i}{n} - U_i \right),$$

$$D_n^- := \sqrt{n} \sup_{\theta \in [0, 2\pi)} \{F(\theta) - F_n(\theta)\} = \sqrt{n} \max_{1 \leq i \leq n} \left( U_i - \frac{i-1}{n} \right),$$

where  $U_i = \theta_i/(2\pi)$ . Then, the test statistic is defined as

$$V_n := D_n^+ + D_n^-.$$

The critical value is found in the statistical table. For example, for the significance level  $\alpha = 0.01$ , the critical value is 2.001.
